# Supplementary material for: miR-634 Activates the Mitochondrial Apoptosis Pathway and Enhances Chemotherapy-Induced Cytotoxicity
Source: Oxford University Press journal article supplement (doi:10.1158/0008-5472.can-15-0257), 2015-07-27
Supplement: 00085472can150257-sup-144401_1_supp_3015495_nps4vz.xlsx [file 00085472can150257-sup-144401_1_supp_3015495_nps4vz.xlsx]

## Sheet: Sheet1
Supplementary Table S1 List of the 626 predicted target genes of miR-634
Gene name	Accession No.	Description
AVEN	NM_020371	Homo sapiens apoptosis, caspase activation inhibitor (AVEN), mRNA [NM_020371]
AATF	NM_012138	Homo sapiens apoptosis antagonizing transcription factor (AATF), mRNA [NM_012138]
XIAP	NM_001167	Homo sapiens X-linked inhibitor of apoptosis (XIAP), transcript variant 1, mRNA [NM_001167]
APIP	NM_015957	Homo sapiens APAF1 interacting protein (APIP), mRNA [NM_015957]
LAMP2	NM_013995	Homo sapiens lysosomal-associated membrane protein 2 (LAMP2), transcript variant B, mRNA [NM_013995]
ATP6V1B2	NM_001693	Homo sapiens ATPase, H+ transporting, lysosomal 56/58kDa, V1 subunit B2 (ATP6V1B2), mRNA [NM_001693]
ATP6V1F	NM_004231	Homo sapiens ATPase, H+ transporting, lysosomal 14kDa, V1 subunit F (ATP6V1F), transcript variant 1, mRNA [NM_004231]
ATP6V0B	NM_004047	Homo sapiens ATPase, H+ transporting, lysosomal 21kDa, V0 subunit b (ATP6V0B), transcript variant 1, mRNA [NM_004047]
BLOC1S2	NM_001001342	Homo sapiens biogenesis of lysosomal organelles complex-1, subunit 2 (BLOC1S2), transcript variant 2, mRNA [NM_001001342]
TK2	NM_004614	Homo sapiens thymidine kinase 2, mitochondrial (TK2), transcript variant 1, mRNA [NM_004614]
MAVS	NM_020746	Homo sapiens mitochondrial antiviral signaling protein (MAVS), transcript variant 1, mRNA [NM_020746]
MRPS25	NM_022497	Homo sapiens mitochondrial ribosomal protein S25 (MRPS25), mRNA [NM_022497]
UQCRH		Homo sapiens mitochondrial hinge protein precursor, mRNA, complete cds. [M36647]
LARS2	NM_015340	Homo sapiens leucyl-tRNA synthetase 2, mitochondrial (LARS2), mRNA [NM_015340]
UCP2	NM_003355	Homo sapiens uncoupling protein 2 (mitochondrial, proton carrier) (UCP2), mRNA [NM_003355]
TFAM	NM_003201	Homo sapiens transcription factor A, mitochondrial (TFAM), transcript variant 1, mRNA [NM_003201]
TIMMDC1	NM_016589	Homo sapiens translocase of inner mitochondrial membrane domain containing 1 (TIMMDC1), mRNA [NM_016589]
MTFR1	NM_014637	Homo sapiens mitochondrial fission regulator 1 (MTFR1), transcript variant 1, mRNA [NM_014637]
SLC25A22	NM_024698	Homo sapiens solute carrier family 25 (mitochondrial carrier: glutamate), member 22 (SLC25A22), transcript variant 2, mRNA [NM_024698]
OPA1	NM_130837	Homo sapiens optic atrophy 1 (autosomal dominant) (OPA1), transcript variant 8, mRNA [NM_130837]
NEK9	NM_033116	Homo sapiens NIMA-related kinase 9 (NEK9), mRNA [NM_033116]
RBMXL1	NM_001162536	Homo sapiens RNA binding motif protein, X-linked-like 1 (RBMXL1), transcript variant 1, mRNA [NM_001162536]
PRRC2B	NM_013318	Homo sapiens proline-rich coiled-coil 2B (PRRC2B), mRNA [NM_013318]
HCFC1R1	NM_017885	Homo sapiens host cell factor C1 regulator 1 (XPO1 dependent) (HCFC1R1), transcript variant 1, mRNA [NM_017885]
ARHGAP35	NM_004491	Homo sapiens Rho GTPase activating protein 35 (ARHGAP35), mRNA [NM_004491]
ADAM22	NM_021723	Homo sapiens ADAM metallopeptidase domain 22 (ADAM22), transcript variant 1, mRNA [NM_021723]
DMXL1	NM_005509	Homo sapiens Dmx-like 1 (DMXL1), mRNA [NM_005509]
TMEM136	NM_174926	Homo sapiens transmembrane protein 136 (TMEM136), transcript variant 2, mRNA [NM_174926]
IQCB1	NM_001023571	Homo sapiens IQ motif containing B1 (IQCB1), transcript variant 3, mRNA [NM_001023571]
USP9X	NM_001039590	Homo sapiens ubiquitin specific peptidase 9, X-linked (USP9X), transcript variant 3, mRNA [NM_001039590]
KIAA1324L	NM_152748	Homo sapiens KIAA1324-like (KIAA1324L), transcript variant 2, mRNA [NM_152748]
ZNF519	NM_145287	Homo sapiens zinc finger protein 519 (ZNF519), transcript variant 1, mRNA [NM_145287]
ATXN7L1	NM_152749	Homo sapiens ataxin 7-like 1 (ATXN7L1), transcript variant 2, mRNA [NM_152749]
TCEANC2	NM_153035	Homo sapiens transcription elongation factor A (SII) N-terminal and central domain containing 2 (TCEANC2), mRNA [NM_153035]
ARL2BP	NM_012106	Homo sapiens ADP-ribosylation factor-like 2 binding protein (ARL2BP), mRNA [NM_012106]
NUSAP1	NM_016359	Homo sapiens nucleolar and spindle associated protein 1 (NUSAP1), transcript variant 1, mRNA [NM_016359]
TRIM33	NM_033020	Homo sapiens tripartite motif containing 33 (TRIM33), transcript variant b, mRNA [NM_033020]
ACER3	NM_018367	Homo sapiens alkaline ceramidase 3 (ACER3), mRNA [NM_018367]
VPS45	NM_007259	Homo sapiens vacuolar protein sorting 45 homolog (S. cerevisiae) (VPS45), transcript variant 1, mRNA [NM_007259]
DSE	NM_013352	Homo sapiens dermatan sulfate epimerase (DSE), transcript variant 1, mRNA [NM_013352]
FBXW11	NM_012300	Homo sapiens F-box and WD repeat domain containing 11 (FBXW11), transcript variant 3, mRNA [NM_012300]
DEDD	NM_032998	Homo sapiens death effector domain containing (DEDD), transcript variant 1, mRNA [NM_032998]
ARFIP2	NM_012402	Homo sapiens ADP-ribosylation factor interacting protein 2 (ARFIP2), transcript variant 2, mRNA [NM_012402]
RERE	NM_012102	Homo sapiens arginine-glutamic acid dipeptide (RE) repeats (RERE), transcript variant 1, mRNA [NM_012102]
BOK	NM_032515	Homo sapiens BCL2-related ovarian killer (BOK), mRNA [NM_032515]
CXorf23	NM_198279	Homo sapiens chromosome X open reading frame 23 (CXorf23), mRNA [NM_198279]
SOCS7	NM_014598	Homo sapiens suppressor of cytokine signaling 7 (SOCS7), mRNA [NM_014598]
ANKH	NM_054027	Homo sapiens ANKH inorganic pyrophosphate transport regulator (ANKH), mRNA [NM_054027]
NFATC2IP	NM_032815	Homo sapiens nuclear factor of activated T-cells, cytoplasmic, calcineurin-dependent 2 interacting protein (NFATC2IP), mRNA [NM_032815]
MXRA7	NM_001008528	Homo sapiens matrix-remodelling associated 7 (MXRA7), transcript variant 1, mRNA [NM_001008528]
ENPP1	NM_006208	Homo sapiens ectonucleotide pyrophosphatase/phosphodiesterase 1 (ENPP1), mRNA [NM_006208]
GET4	NM_015949	Homo sapiens golgi to ER traffic protein 4 homolog (S. cerevisiae) (GET4), mRNA [NM_015949]
DCAF7	NM_005828	Homo sapiens DDB1 and CUL4 associated factor 7 (DCAF7), transcript variant 1, mRNA [NM_005828]
RASA1	NM_002890	Homo sapiens RAS p21 protein activator (GTPase activating protein) 1 (RASA1), transcript variant 1, mRNA [NM_002890]
C6orf106	NM_024294	Homo sapiens chromosome 6 open reading frame 106 (C6orf106), transcript variant 1, mRNA [NM_024294]
EDEM1	NM_014674	Homo sapiens ER degradation enhancer, mannosidase alpha-like 1 (EDEM1), mRNA [NM_014674]
POLDIP3	NM_032311	Homo sapiens polymerase (DNA-directed), delta interacting protein 3 (POLDIP3), transcript variant 1, mRNA [NM_032311]
RAB11FIP2	NM_014904	Homo sapiens RAB11 family interacting protein 2 (class I) (RAB11FIP2), mRNA [NM_014904]
ITGA7	NM_002206	Homo sapiens integrin, alpha 7 (ITGA7), transcript variant 2, mRNA [NM_002206]
STMN1	NM_203401	Homo sapiens stathmin 1 (STMN1), transcript variant 1, mRNA [NM_203401]
TTC23	NM_001040655	Homo sapiens tetratricopeptide repeat domain 23 (TTC23), transcript variant 1, mRNA [NM_001040655]
TMEM167B	NM_020141	Homo sapiens transmembrane protein 167B (TMEM167B), mRNA [NM_020141]
PATL1	NM_152716	Homo sapiens protein associated with topoisomerase II homolog 1 (yeast) (PATL1), mRNA [NM_152716]
LANCL1	NM_006055	Homo sapiens LanC lantibiotic synthetase component C-like 1 (bacterial) (LANCL1), transcript variant 1, mRNA [NM_006055]
PPP4R1	NM_001042388	Homo sapiens protein phosphatase 4, regulatory subunit 1 (PPP4R1), transcript variant 1, mRNA [NM_001042388]
ST3GAL2	NM_006927	Homo sapiens ST3 beta-galactoside alpha-2,3-sialyltransferase 2 (ST3GAL2), mRNA [NM_006927]
CELSR3	NM_001407	Homo sapiens cadherin, EGF LAG seven-pass G-type receptor 3 (CELSR3), mRNA [NM_001407]
NPRL2	NM_006545	Homo sapiens nitrogen permease regulator-like 2 (S. cerevisiae) (NPRL2), mRNA [NM_006545]
SLC30A5	NM_022902	Homo sapiens solute carrier family 30 (zinc transporter), member 5 (SLC30A5), transcript variant 1, mRNA [NM_022902]
PRKACA	NM_002730	Homo sapiens protein kinase, cAMP-dependent, catalytic, alpha (PRKACA), transcript variant 1, mRNA [NM_002730]
HIAT1	NM_033055	Homo sapiens hippocampus abundant transcript 1 (HIAT1), mRNA [NM_033055]
NFS1	NM_021100	Homo sapiens NFS1 cysteine desulfurase (NFS1), transcript variant 1, mRNA [NM_021100]
CLCN3	NM_001829	Homo sapiens chloride channel, voltage-sensitive 3 (CLCN3), transcript variant b, mRNA [NM_001829]
GBP1	NM_002053	Homo sapiens guanylate binding protein 1, interferon-inducible (GBP1), mRNA [NM_002053]
FBRSL1	NM_001142641	Homo sapiens fibrosin-like 1 (FBRSL1), mRNA [NM_001142641]
SYS1	NM_033542	Homo sapiens SYS1 Golgi-localized integral membrane protein homolog (S. cerevisiae) (SYS1), transcript variant 1, mRNA [NM_033542]
ZC3H7B		Homo sapiens zinc finger CCCH-type containing 7B, mRNA (cDNA clone IMAGE:3690478), partial cds. [BC004857]
MAP3K1	NM_005921	Homo sapiens mitogen-activated protein kinase kinase kinase 1, E3 ubiquitin protein ligase (MAP3K1), mRNA [NM_005921]
YTHDF1	NM_017798	Homo sapiens YTH domain family, member 1 (YTHDF1), mRNA [NM_017798]
HADHA	NM_000182	Homo sapiens hydroxyacyl-CoA dehydrogenase/3-ketoacyl-CoA thiolase/enoyl-CoA hydratase (trifunctional protein), alpha subunit (HADHA), mRNA [NM_000182]
KITLG	NM_000899	Homo sapiens KIT ligand (KITLG), transcript variant b, mRNA [NM_000899]
PAN3	NM_175854	Homo sapiens PAN3 poly(A) specific ribonuclease subunit homolog (S. cerevisiae) (PAN3), mRNA [NM_175854]
CRKL	NM_005207	Homo sapiens v-crk avian sarcoma virus CT10 oncogene homolog-like (CRKL), mRNA [NM_005207]
PCMTD2	NM_018257	Homo sapiens protein-L-isoaspartate (D-aspartate) O-methyltransferase domain containing 2 (PCMTD2), transcript variant 1, mRNA [NM_018257]
PRRC2C	NM_015172	Homo sapiens proline-rich coiled-coil 2C (PRRC2C), mRNA [NM_015172]
LFNG	NM_001040167	Homo sapiens LFNG O-fucosylpeptide 3-beta-N-acetylglucosaminyltransferase (LFNG), transcript variant 1, mRNA [NM_001040167]
CCDC28A	NM_015439	Homo sapiens coiled-coil domain containing 28A (CCDC28A), mRNA [NM_015439]
ALG10B	NM_001013620	Homo sapiens ALG10B, alpha-1,2-glucosyltransferase (ALG10B), mRNA [NM_001013620]
SF3B3	NM_012426	Homo sapiens splicing factor 3b, subunit 3, 130kDa (SF3B3), mRNA [NM_012426]
SHROOM3	NM_020859	Homo sapiens shroom family member 3 (SHROOM3), mRNA [NM_020859]
SIK2	NM_015191	Homo sapiens salt-inducible kinase 2 (SIK2), mRNA [NM_015191]
SMYD5	NM_006062	Homo sapiens SMYD family member 5 (SMYD5), mRNA [NM_006062]
TMEM110	NM_198563	Homo sapiens transmembrane protein 110 (TMEM110), mRNA [NM_198563]
TBC1D24	NM_001199107	Homo sapiens TBC1 domain family, member 24 (TBC1D24), transcript variant 1, mRNA [NM_001199107]
TTC28	NM_001145418	Homo sapiens tetratricopeptide repeat domain 28 (TTC28), mRNA [NM_001145418]
AAK1	NM_014911	Homo sapiens AP2 associated kinase 1 (AAK1), mRNA [NM_014911]
POLD3	NM_006591	Homo sapiens polymerase (DNA-directed), delta 3, accessory subunit (POLD3), transcript variant 1, mRNA [NM_006591]
MFHAS1	NM_004225	Homo sapiens malignant fibrous histiocytoma amplified sequence 1 (MFHAS1), mRNA [NM_004225]
ZNF518A	NM_014803	Homo sapiens zinc finger protein 518A (ZNF518A), transcript variant 2, mRNA [NM_014803]
MORN4		Homo sapiens MORN repeat containing 4, mRNA (cDNA clone IMAGE:4690584), complete cds. [BC022054]
PACSIN2	NM_007229	Homo sapiens protein kinase C and casein kinase substrate in neurons 2 (PACSIN2), transcript variant 2, mRNA [NM_007229]
PAFAH1B1	NM_000430	Homo sapiens platelet-activating factor acetylhydrolase 1b, regulatory subunit 1 (45kDa) (PAFAH1B1), mRNA [NM_000430]
RAB43	NM_198490	Homo sapiens RAB43, member RAS oncogene family (RAB43), transcript variant 1, mRNA [NM_198490]
RNF169	NM_001098638	Homo sapiens ring finger protein 169 (RNF169), mRNA [NM_001098638]
MED1	NM_004774	Homo sapiens mediator complex subunit 1 (MED1), mRNA [NM_004774]
FAM109A	NM_144671	Homo sapiens family with sequence similarity 109, member A (FAM109A), transcript variant 2, mRNA [NM_144671]
IL17RA	NM_014339	Homo sapiens interleukin 17 receptor A (IL17RA), mRNA [NM_014339]
CCDC94	NM_018074	Homo sapiens coiled-coil domain containing 94 (CCDC94), mRNA [NM_018074]
WDR20	NM_181291	Homo sapiens WD repeat domain 20 (WDR20), transcript variant 1, mRNA [NM_181291]
TNIP2	NM_024309	Homo sapiens TNFAIP3 interacting protein 2 (TNIP2), transcript variant 1, mRNA [NM_024309]
RNPEPL1	NM_018226	Homo sapiens arginyl aminopeptidase (aminopeptidase B)-like 1 (RNPEPL1), mRNA [NM_018226]
GIT2	NM_057169	Homo sapiens G protein-coupled receptor kinase interacting ArfGAP 2 (GIT2), transcript variant 1, mRNA [NM_057169]
STAT3	NM_213662	Homo sapiens signal transducer and activator of transcription 3 (acute-phase response factor) (STAT3), transcript variant 3, mRNA [NM_213662]
BMPR1B	NM_001203	Homo sapiens bone morphogenetic protein receptor, type IB (BMPR1B), transcript variant 2, mRNA [NM_001203]
VPS26A	NM_004896	Homo sapiens vacuolar protein sorting 26 homolog A (S. pombe) (VPS26A), transcript variant 1, mRNA [NM_004896]
ZNF609	NM_015042	Homo sapiens zinc finger protein 609 (ZNF609), mRNA [NM_015042]
MUM1	NM_032853	Homo sapiens melanoma associated antigen (mutated) 1 (MUM1), transcript variant 1, mRNA [NM_032853]
SMPD4	NM_017951	Homo sapiens sphingomyelin phosphodiesterase 4, neutral membrane (neutral sphingomyelinase-3) (SMPD4), transcript variant 2, mRNA [NM_017951]
RPS6KB1	NM_003161	Homo sapiens ribosomal protein S6 kinase, 70kDa, polypeptide 1 (RPS6KB1), transcript variant 1, mRNA [NM_003161]
TRAM2	NM_012288	Homo sapiens translocation associated membrane protein 2 (TRAM2), mRNA [NM_012288]
RBM12	NM_006047	Homo sapiens RNA binding motif protein 12 (RBM12), transcript variant 1, mRNA [NM_006047]
UNK	NM_001080419	Homo sapiens unkempt family zinc finger (UNK), transcript variant 1, mRNA [NM_001080419]
C7orf60	NM_152556	Homo sapiens chromosome 7 open reading frame 60 (C7orf60), mRNA [NM_152556]
ZNF33A		Homo sapiens cDNA: FLJ23404 fis, clone HEP18862. [AK027057]
PSKH1	NM_006742	Homo sapiens protein serine kinase H1 (PSKH1), mRNA [NM_006742]
ARGLU1	NM_018011	Homo sapiens arginine and glutamate rich 1 (ARGLU1), mRNA [NM_018011]
CHD6	NM_032221	Homo sapiens chromodomain helicase DNA binding protein 6 (CHD6), mRNA [NM_032221]
CNOT8	NM_004779	Homo sapiens CCR4-NOT transcription complex, subunit 8 (CNOT8), mRNA [NM_004779]
TSPAN14	NM_030927	Homo sapiens tetraspanin 14 (TSPAN14), transcript variant 1, mRNA [NM_030927]
NFE2L2	NM_006164	Homo sapiens nuclear factor, erythroid 2-like 2 (NFE2L2), transcript variant 1, mRNA [NM_006164]
LDB1	NM_003893	Homo sapiens LIM domain binding 1 (LDB1), transcript variant 3, mRNA [NM_003893]
NUDT3		nudix (nucleoside diphosphate linked moiety X)-type motif 3 [Source:HGNC Symbol;Acc:8050] [ENST00000607016]
LNX2	NM_153371	Homo sapiens ligand of numb-protein X 2 (LNX2), mRNA [NM_153371]
VPRBP	NM_014703	Homo sapiens Vpr (HIV-1) binding protein (VPRBP), transcript variant 1, mRNA [NM_014703]
M6PR	NM_002355	Homo sapiens mannose-6-phosphate receptor (cation dependent) (M6PR), transcript variant 1, mRNA [NM_002355]
KCNK5	NM_003740	Homo sapiens potassium channel, subfamily K, member 5 (KCNK5), mRNA [NM_003740]
IDE	NM_004969	Homo sapiens insulin-degrading enzyme (IDE), transcript variant 1, mRNA [NM_004969]
AP2B1	NM_001030006	Homo sapiens adaptor-related protein complex 2, beta 1 subunit (AP2B1), transcript variant 1, mRNA [NM_001030006]
CAMKK1	NM_032294	Homo sapiens calcium/calmodulin-dependent protein kinase kinase 1, alpha (CAMKK1), transcript variant 1, mRNA [NM_032294]
PPP2R5C	NM_002719	Homo sapiens protein phosphatase 2, regulatory subunit B', gamma (PPP2R5C), transcript variant 1, mRNA [NM_002719]
LCOR	NM_032440	Homo sapiens ligand dependent nuclear receptor corepressor (LCOR), transcript variant 1, mRNA [NM_032440]
RANBP10	NM_020850	Homo sapiens RAN binding protein 10 (RANBP10), mRNA [NM_020850]
L3MBTL3	NM_032438	Homo sapiens l(3)mbt-like 3 (Drosophila) (L3MBTL3), transcript variant 1, mRNA [NM_032438]
CHST14	NM_130468	Homo sapiens carbohydrate (N-acetylgalactosamine 4-0) sulfotransferase 14 (CHST14), mRNA [NM_130468]
COMMD7	NM_053041	Homo sapiens COMM domain containing 7 (COMMD7), transcript variant 1, mRNA [NM_053041]
METRN	NM_024042	Homo sapiens meteorin, glial cell differentiation regulator (METRN), mRNA [NM_024042]
ZNF280D	NM_017661	Homo sapiens zinc finger protein 280D (ZNF280D), transcript variant 1, mRNA [NM_017661]
ZNF292	NM_015021	Homo sapiens zinc finger protein 292 (ZNF292), mRNA [NM_015021]
F8	NM_000132	Homo sapiens coagulation factor VIII, procoagulant component (F8), transcript variant 1, mRNA [NM_000132]
STX5	NM_003164	Homo sapiens syntaxin 5 (STX5), transcript variant 1, mRNA [NM_003164]
SNX11	NM_152244	Homo sapiens sorting nexin 11 (SNX11), transcript variant 1, mRNA [NM_152244]
C9orf72	NM_018325	Homo sapiens chromosome 9 open reading frame 72 (C9orf72), transcript variant 2, mRNA [NM_018325]
DNM2	NM_001005360	Homo sapiens dynamin 2 (DNM2), transcript variant 1, mRNA [NM_001005360]
DCTN5	NM_032486	Homo sapiens dynactin 5 (p25) (DCTN5), transcript variant 1, mRNA [NM_032486]
AHRR	NM_020731	Homo sapiens aryl-hydrocarbon receptor repressor (AHRR), transcript variant 1, mRNA [NM_020731]
NSUN5	NM_148956	Homo sapiens NOP2/Sun domain family, member 5 (NSUN5), transcript variant 1, mRNA [NM_148956]
DYRK1A	NM_130436	Homo sapiens dual-specificity tyrosine-(Y)-phosphorylation regulated kinase 1A (DYRK1A), transcript variant 2, mRNA [NM_130436]
NECAP2	NM_018090	Homo sapiens NECAP endocytosis associated 2 (NECAP2), transcript variant 1, mRNA [NM_018090]
SAMD4B	NM_018028	Homo sapiens sterile alpha motif domain containing 4B (SAMD4B), mRNA [NM_018028]
CELF1	NM_001172640	Homo sapiens CUGBP, Elav-like family member 1 (CELF1), transcript variant 5, mRNA [NM_001172640]
NUBP1	NM_002484	Homo sapiens nucleotide binding protein 1 (NUBP1), transcript variant 1, mRNA [NM_002484]
ATP1B1	NM_001677	Homo sapiens ATPase, Na+/K+ transporting, beta 1 polypeptide (ATP1B1), mRNA [NM_001677]
BAIAP2	NM_017450	Homo sapiens BAI1-associated protein 2 (BAIAP2), transcript variant 1, mRNA [NM_017450]
ZC3H12C	NM_033390	Homo sapiens zinc finger CCCH-type containing 12C (ZC3H12C), mRNA [NM_033390]
TMEM53	NM_024587	Homo sapiens transmembrane protein 53 (TMEM53), mRNA [NM_024587]
H2AFV	NM_138635	Homo sapiens H2A histone family, member V (H2AFV), transcript variant 2, mRNA [NM_138635]
EEF1A1	NM_001402	Homo sapiens eukaryotic translation elongation factor 1 alpha 1 (EEF1A1), mRNA [NM_001402]
PRELID2	NM_138492	Homo sapiens PRELI domain containing 2 (PRELID2), transcript variant 3, mRNA [NM_138492]
PMEPA1	NM_020182	Homo sapiens prostate transmembrane protein, androgen induced 1 (PMEPA1), transcript variant 1, mRNA [NM_020182]
STUB1	NM_005861	Homo sapiens STIP1 homology and U-box containing protein 1, E3 ubiquitin protein ligase (STUB1), mRNA [NM_005861]
NAA40	NM_024771	Homo sapiens N(alpha)-acetyltransferase 40, NatD catalytic subunit (NAA40), mRNA [NM_024771]
ISLR	NM_005545	Homo sapiens immunoglobulin superfamily containing leucine-rich repeat (ISLR), transcript variant 1, mRNA [NM_005545]
CLASP2	NM_015097	Homo sapiens cytoplasmic linker associated protein 2 (CLASP2), transcript variant 1, mRNA [NM_015097]
CTNND1	NM_001085458	Homo sapiens catenin (cadherin-associated protein), delta 1 (CTNND1), transcript variant 1, mRNA [NM_001085458]
DOT1L	NM_032482	Homo sapiens DOT1-like histone H3K79 methyltransferase (DOT1L), mRNA [NM_032482]
ARFGEF1	NM_006421	Homo sapiens ADP-ribosylation factor guanine nucleotide-exchange factor 1 (brefeldin A-inhibited) (ARFGEF1), mRNA [NM_006421]
ZNF264	NM_003417	Homo sapiens zinc finger protein 264 (ZNF264), mRNA [NM_003417]
CMTM4	NM_178818	Homo sapiens CKLF-like MARVEL transmembrane domain containing 4 (CMTM4), transcript variant 1, mRNA [NM_178818]
ZNF71	NM_021216	Homo sapiens zinc finger protein 71 (ZNF71), mRNA [NM_021216]
CARKD	NM_018210	Homo sapiens carbohydrate kinase domain containing (CARKD), transcript variant 1, mRNA [NM_018210]
SCAMP4	NM_079834	Homo sapiens secretory carrier membrane protein 4 (SCAMP4), mRNA [NM_079834]
VANGL1	NM_138959	Homo sapiens VANGL planar cell polarity protein 1 (VANGL1), transcript variant 1, mRNA [NM_138959]
FANCF	NM_022725	Homo sapiens Fanconi anemia, complementation group F (FANCF), mRNA [NM_022725]
ACTR1A	NM_005736	Homo sapiens ARP1 actin-related protein 1 homolog A, centractin alpha (yeast) (ACTR1A), mRNA [NM_005736]
CAPRIN1	NM_203364	Homo sapiens cell cycle associated protein 1 (CAPRIN1), transcript variant 2, mRNA [NM_203364]
SETD5	NM_001080517	Homo sapiens SET domain containing 5 (SETD5), mRNA [NM_001080517]
STAU2	NM_014393	Homo sapiens staufen double-stranded RNA binding protein 2 (STAU2), transcript variant 5, mRNA [NM_014393]
FBXO8	NM_012180	Homo sapiens F-box protein 8 (FBXO8), mRNA [NM_012180]
PGAP3	NM_033419	Homo sapiens post-GPI attachment to proteins 3 (PGAP3), mRNA [NM_033419]
DHX8	NM_004941	Homo sapiens DEAH (Asp-Glu-Ala-His) box polypeptide 8 (DHX8), mRNA [NM_004941]
SMARCD2	NM_001098426	Homo sapiens SWI/SNF related, matrix associated, actin dependent regulator of chromatin, subfamily d, member 2 (SMARCD2), mRNA [NM_001098426]
FPGS		folylpolyglutamate synthase [Source:HGNC Symbol;Acc:3824] [ENST00000479375]
GAS8	NM_001481	Homo sapiens growth arrest-specific 8 (GAS8), transcript variant 1, mRNA [NM_001481]
ABTB2	NM_145804	Homo sapiens ankyrin repeat and BTB (POZ) domain containing 2 (ABTB2), mRNA [NM_145804]
TMEM120B	NM_001080825	Homo sapiens transmembrane protein 120B (TMEM120B), mRNA [NM_001080825]
TBC1D9B	NM_198868	Homo sapiens TBC1 domain family, member 9B (with GRAM domain) (TBC1D9B), transcript variant 1, mRNA [NM_198868]
SCD	NM_005063	Homo sapiens stearoyl-CoA desaturase (delta-9-desaturase) (SCD), mRNA [NM_005063]
AP3M1	NM_207012	Homo sapiens adaptor-related protein complex 3, mu 1 subunit (AP3M1), transcript variant 1, mRNA [NM_207012]
NPLOC4	NM_017921	Homo sapiens nuclear protein localization 4 homolog (S. cerevisiae) (NPLOC4), mRNA [NM_017921]
PHIP	NM_017934	Homo sapiens pleckstrin homology domain interacting protein (PHIP), mRNA [NM_017934]
GLG1	NM_001145667	Homo sapiens golgi glycoprotein 1 (GLG1), transcript variant 3, mRNA [NM_001145667]
LOXL3	NM_032603	Homo sapiens lysyl oxidase-like 3 (LOXL3), mRNA [NM_032603]
POU2F1	NM_001198783	Homo sapiens POU class 2 homeobox 1 (POU2F1), transcript variant 2, mRNA [NM_001198783]
WDR7	NM_015285	Homo sapiens WD repeat domain 7 (WDR7), transcript variant 1, mRNA [NM_015285]
BAHD1	NM_014952	Homo sapiens bromo adjacent homology domain containing 1 (BAHD1), mRNA [NM_014952]
HTT	NM_002111	Homo sapiens huntingtin (HTT), mRNA [NM_002111]
TANC2	NM_025185	Homo sapiens tetratricopeptide repeat, ankyrin repeat and coiled-coil containing 2 (TANC2), mRNA [NM_025185]
OTUB1	NM_017670	Homo sapiens OTU domain, ubiquitin aldehyde binding 1 (OTUB1), transcript variant 1, mRNA [NM_017670]
CLPTM1L	NM_030782	Homo sapiens CLPTM1-like (CLPTM1L), mRNA [NM_030782]
RBBP4	NM_005610	Homo sapiens retinoblastoma binding protein 4 (RBBP4), transcript variant 1, mRNA [NM_005610]
C16orf59	NM_025108	Homo sapiens chromosome 16 open reading frame 59 (C16orf59), mRNA [NM_025108]
PRKAB2	NM_005399	Homo sapiens protein kinase, AMP-activated, beta 2 non-catalytic subunit (PRKAB2), transcript variant 1, mRNA [NM_005399]
NUP153	NM_005124	Homo sapiens nucleoporin 153kDa (NUP153), transcript variant 2, mRNA [NM_005124]
MORF4L2	NM_012286	Homo sapiens mortality factor 4 like 2 (MORF4L2), transcript variant 2, mRNA [NM_012286]
COX10	NM_001303	Homo sapiens cytochrome c oxidase assembly homolog 10 (yeast) (COX10), mRNA [NM_001303]
TWISTNB	NM_001002926	Homo sapiens TWIST neighbor (TWISTNB), mRNA [NM_001002926]
ZNF30	NM_194325	Homo sapiens zinc finger protein 30 (ZNF30), transcript variant 3, mRNA [NM_194325]
SRSF2	NM_003016	Homo sapiens serine/arginine-rich splicing factor 2 (SRSF2), transcript variant 1, mRNA [NM_003016]
MRAS	NM_012219	Homo sapiens muscle RAS oncogene homolog (MRAS), transcript variant 1, mRNA [NM_012219]
GTPBP2	NM_019096	Homo sapiens GTP binding protein 2 (GTPBP2), transcript variant 1, mRNA [NM_019096]
TGIF2	NM_021809	Homo sapiens TGFB-induced factor homeobox 2 (TGIF2), transcript variant 2, mRNA [NM_021809]
SNX13	NM_015132	Homo sapiens sorting nexin 13 (SNX13), mRNA [NM_015132]
MPDU1	NM_004870	Homo sapiens mannose-P-dolichol utilization defect 1 (MPDU1), transcript variant 1, mRNA [NM_004870]
WDR36	NM_139281	Homo sapiens WD repeat domain 36 (WDR36), mRNA [NM_139281]
DIP2A	NM_206890	Homo sapiens DIP2 disco-interacting protein 2 homolog A (Drosophila) (DIP2A), transcript variant 3, mRNA [NM_206890]
POMT2	NM_013382	Homo sapiens protein-O-mannosyltransferase 2 (POMT2), mRNA [NM_013382]
IPO9	NM_018085	Homo sapiens importin 9 (IPO9), mRNA [NM_018085]
C2CD2	NM_015500	Homo sapiens C2 calcium-dependent domain containing 2 (C2CD2), transcript variant 1, mRNA [NM_015500]
OPHN1	NM_002547	Homo sapiens oligophrenin 1 (OPHN1), mRNA [NM_002547]
TMEM18	NM_152834	Homo sapiens transmembrane protein 18 (TMEM18), mRNA [NM_152834]
EDC3	NM_025083	Homo sapiens enhancer of mRNA decapping 3 (EDC3), transcript variant 3, mRNA [NM_025083]
STRBP	NM_018387	Homo sapiens spermatid perinuclear RNA binding protein (STRBP), transcript variant 1, mRNA [NM_018387]
TECPR2	NM_014844	Homo sapiens tectonin beta-propeller repeat containing 2 (TECPR2), transcript variant 1, mRNA [NM_014844]
ADCY9	NM_001116	Homo sapiens adenylate cyclase 9 (ADCY9), mRNA [NM_001116]
MED13L	NM_015335	Homo sapiens mediator complex subunit 13-like (MED13L), mRNA [NM_015335]
TULP4	NM_020245	Homo sapiens tubby like protein 4 (TULP4), transcript variant 1, mRNA [NM_020245]
PDPK1	NM_002613	Homo sapiens 3-phosphoinositide dependent protein kinase-1 (PDPK1), transcript variant 1, mRNA [NM_002613]
DVL3	NM_004423	Homo sapiens dishevelled segment polarity protein 3 (DVL3), mRNA [NM_004423]
NPHP4	NM_015102	Homo sapiens nephronophthisis 4 (NPHP4), mRNA [NM_015102]
BET1L	NM_016526	Homo sapiens Bet1 golgi vesicular membrane trafficking protein-like (BET1L), transcript variant 2, mRNA [NM_016526]
MPDZ	NM_003829	Homo sapiens multiple PDZ domain protein (MPDZ), transcript variant 1, mRNA [NM_003829]
PAIP2B	NM_020459	Homo sapiens poly(A) binding protein interacting protein 2B (PAIP2B), mRNA [NM_020459]
TMED9	NM_017510	Homo sapiens transmembrane emp24 protein transport domain containing 9 (TMED9), mRNA [NM_017510]
RAB11A	NM_004663	Homo sapiens RAB11A, member RAS oncogene family (RAB11A), transcript variant 1, mRNA [NM_004663]
LYRM2	NM_020466	Homo sapiens LYR motif containing 2 (LYRM2), transcript variant 1, mRNA [NM_020466]
PSD3	NM_015310	Homo sapiens pleckstrin and Sec7 domain containing 3 (PSD3), transcript variant 1, mRNA [NM_015310]
ZBTB5	NM_014872	Homo sapiens zinc finger and BTB domain containing 5 (ZBTB5), mRNA [NM_014872]
TMCO6	NM_018502	Homo sapiens transmembrane and coiled-coil domains 6 (TMCO6), mRNA [NM_018502]
EHD2	NM_014601	Homo sapiens EH-domain containing 2 (EHD2), mRNA [NM_014601]
FAM13B	NM_016603	Homo sapiens family with sequence similarity 13, member B (FAM13B), transcript variant 1, mRNA [NM_016603]
ROGDI	NM_024589	Homo sapiens rogdi homolog (Drosophila) (ROGDI), transcript variant 1, mRNA [NM_024589]
TMEM129	NM_138385	Homo sapiens transmembrane protein 129 (TMEM129), transcript variant 2, mRNA [NM_138385]
MAFG	NM_002359	Homo sapiens v-maf avian musculoaponeurotic fibrosarcoma oncogene homolog G (MAFG), transcript variant 1, mRNA [NM_002359]
FLCN	NM_144606	Homo sapiens folliculin (FLCN), transcript variant 2, mRNA [NM_144606]
ZNF219	NM_016423	Homo sapiens zinc finger protein 219 (ZNF219), transcript variant 1, mRNA [NM_016423]
IL10RB	NM_000628	Homo sapiens interleukin 10 receptor, beta (IL10RB), mRNA [NM_000628]
DLG3	NM_021120	Homo sapiens discs, large homolog 3 (Drosophila) (DLG3), transcript variant 1, mRNA [NM_021120]
TATDN2	NM_014760	Homo sapiens TatD DNase domain containing 2 (TATDN2), mRNA [NM_014760]
C19orf12	NM_031448	Homo sapiens chromosome 19 open reading frame 12 (C19orf12), transcript variant 2, mRNA [NM_031448]
THAP11	NM_020457	Homo sapiens THAP domain containing 11 (THAP11), mRNA [NM_020457]
DNAJC21	NM_194283	Homo sapiens DnaJ (Hsp40) homolog, subfamily C, member 21 (DNAJC21), transcript variant 1, mRNA [NM_194283]
FSTL3	NM_005860	Homo sapiens follistatin-like 3 (secreted glycoprotein) (FSTL3), mRNA [NM_005860]
NAGLU	NM_000263	Homo sapiens N-acetylglucosaminidase, alpha (NAGLU), mRNA [NM_000263]
FBXO21	NM_033624	Homo sapiens F-box protein 21 (FBXO21), transcript variant 1, mRNA [NM_033624]
KIAA0430	NM_014647	Homo sapiens KIAA0430 (KIAA0430), transcript variant 1, mRNA [NM_014647]
KIAA0247	NM_014734	Homo sapiens KIAA0247 (KIAA0247), mRNA [NM_014734]
ZNF384	NM_001135734	Homo sapiens zinc finger protein 384 (ZNF384), transcript variant 7, mRNA [NM_001135734]
TRRAP	NM_003496	Homo sapiens transformation/transcription domain-associated protein (TRRAP), transcript variant 2, mRNA [NM_003496]
TOR1AIP2	NM_022347	Homo sapiens torsin A interacting protein 2 (TOR1AIP2), transcript variant 1, mRNA [NM_022347]
GOLPH3	NM_022130	Homo sapiens golgi phosphoprotein 3 (coat-protein) (GOLPH3), mRNA [NM_022130]
PPP1CB	NM_002709	Homo sapiens protein phosphatase 1, catalytic subunit, beta isozyme (PPP1CB), transcript variant 1, mRNA [NM_002709]
ARF4	NM_001660	Homo sapiens ADP-ribosylation factor 4 (ARF4), mRNA [NM_001660]
NUP160	NM_015231	Homo sapiens nucleoporin 160kDa (NUP160), mRNA [NM_015231]
KDM4A	NM_014663	Homo sapiens lysine (K)-specific demethylase 4A (KDM4A), mRNA [NM_014663]
ZNF227	NM_182490	Homo sapiens zinc finger protein 227 (ZNF227), mRNA [NM_182490]
PPM1A	NM_021003	Homo sapiens protein phosphatase, Mg2+/Mn2+ dependent, 1A (PPM1A), transcript variant 1, mRNA [NM_021003]
NUAK1	NM_014840	Homo sapiens NUAK family, SNF1-like kinase, 1 (NUAK1), mRNA [NM_014840]
SPTLC3	NM_018327	Homo sapiens serine palmitoyltransferase, long chain base subunit 3 (SPTLC3), mRNA [NM_018327]
MFI2	NM_033316	Homo sapiens antigen p97 (melanoma associated) identified by monoclonal antibodies 133.2 and 96.5 (MFI2), transcript variant 2, mRNA [NM_033316]
CCDC167	NM_138493	Homo sapiens coiled-coil domain containing 167 (CCDC167), mRNA [NM_138493]
MLLT1	NM_005934	Homo sapiens myeloid/lymphoid or mixed-lineage leukemia (trithorax homolog, Drosophila); translocated to, 1 (MLLT1), mRNA [NM_005934]
TNFAIP8	NM_014350	Homo sapiens tumor necrosis factor, alpha-induced protein 8 (TNFAIP8), transcript variant 1, mRNA [NM_014350]
UBE2J2	NM_194458	Homo sapiens ubiquitin-conjugating enzyme E2, J2 (UBE2J2), transcript variant 3, mRNA [NM_194458]
TFRC	NM_003234	Homo sapiens transferrin receptor (TFRC), transcript variant 1, mRNA [NM_003234]
TMEM8B	NM_016446	Homo sapiens transmembrane protein 8B (TMEM8B), transcript variant 3, mRNA [NM_016446]
ATG13	NM_014741	Homo sapiens autophagy related 13 (ATG13), transcript variant 2, mRNA [NM_014741]
SAR1A	NM_020150	Homo sapiens SAR1 homolog A (S. cerevisiae) (SAR1A), transcript variant 2, mRNA [NM_020150]
TMOD1	NM_003275	Homo sapiens tropomodulin 1 (TMOD1), transcript variant 1, mRNA [NM_003275]
EIF3F		eukaryotic translation initiation factor 3, subunit F [Source:HGNC Symbol;Acc:3275] [ENST00000533626]
RECK	NM_021111	Homo sapiens reversion-inducing-cysteine-rich protein with kazal motifs (RECK), mRNA [NM_021111]
MYO10	NM_012334	Homo sapiens myosin X (MYO10), mRNA [NM_012334]
SFXN5	NM_144579	Homo sapiens sideroflexin 5 (SFXN5), mRNA [NM_144579]
KPNA1	NM_002264	Homo sapiens karyopherin alpha 1 (importin alpha 5) (KPNA1), transcript variant 1, mRNA [NM_002264]
WWC2	NM_024949	Homo sapiens WW and C2 domain containing 2 (WWC2), mRNA [NM_024949]
KANK2	NM_015493	Homo sapiens KN motif and ankyrin repeat domains 2 (KANK2), transcript variant 1, mRNA [NM_015493]
DDX46	NM_014829	Homo sapiens DEAD (Asp-Glu-Ala-Asp) box polypeptide 46 (DDX46), mRNA [NM_014829]
CHMP6	NM_024591	Homo sapiens charged multivesicular body protein 6 (CHMP6), mRNA [NM_024591]
MED27	NM_004269	Homo sapiens mediator complex subunit 27 (MED27), transcript variant 1, mRNA [NM_004269]
WWC1	NM_015238	Homo sapiens WW and C2 domain containing 1 (WWC1), transcript variant 3, mRNA [NM_015238]
SLC25A42	NM_178526	Homo sapiens solute carrier family 25, member 42 (SLC25A42), mRNA [NM_178526]
ATF2	NM_001256090	Homo sapiens activating transcription factor 2 (ATF2), transcript variant 2, mRNA [NM_001256090]
CDC7	NM_003503	Homo sapiens cell division cycle 7 (CDC7), transcript variant 1, mRNA [NM_003503]
CCDC43	NM_144609	Homo sapiens coiled-coil domain containing 43 (CCDC43), transcript variant 1, mRNA [NM_144609]
AMMECR1	NM_015365	Homo sapiens Alport syndrome, mental retardation, midface hypoplasia and elliptocytosis chromosomal region gene 1 (AMMECR1), transcript variant 1, mRNA [NM_015365]
NFIA	NM_001134673	Homo sapiens nuclear factor I/A (NFIA), transcript variant 1, mRNA [NM_001134673]
EEF2K	NM_013302	Homo sapiens eukaryotic elongation factor-2 kinase (EEF2K), mRNA [NM_013302]
SNX21	NM_001042633	Homo sapiens sorting nexin family member 21 (SNX21), transcript variant 4, mRNA [NM_001042633]
UBE2D4	NM_015983	Homo sapiens ubiquitin-conjugating enzyme E2D 4 (putative) (UBE2D4), mRNA [NM_015983]
VASH1	NM_014909	Homo sapiens vasohibin 1 (VASH1), mRNA [NM_014909]
NUDT16L1	NM_032349	Homo sapiens nudix (nucleoside diphosphate linked moiety X)-type motif 16-like 1 (NUDT16L1), transcript variant 1, mRNA [NM_032349]
AKT2	NM_001626	Homo sapiens v-akt murine thymoma viral oncogene homolog 2 (AKT2), transcript variant 1, mRNA [NM_001626]
ARPP19	NM_006628	Homo sapiens cAMP-regulated phosphoprotein, 19kDa (ARPP19), mRNA [NM_006628]
DDX6	NM_004397	Homo sapiens DEAD (Asp-Glu-Ala-Asp) box helicase 6 (DDX6), transcript variant 1, mRNA [NM_004397]
C17orf51	NM_001113434	Homo sapiens chromosome 17 open reading frame 51 (C17orf51), mRNA [NM_001113434]
RGS12	NM_002926	Homo sapiens regulator of G-protein signaling 12 (RGS12), transcript variant 2, mRNA [NM_002926]
LRIG1	NM_015541	Homo sapiens leucine-rich repeats and immunoglobulin-like domains 1 (LRIG1), mRNA [NM_015541]
UQCR11	NM_006830	Homo sapiens ubiquinol-cytochrome c reductase, complex III subunit XI (UQCR11), mRNA [NM_006830]
MED22	NM_133640	Homo sapiens mediator complex subunit 22 (MED22), transcript variant b, mRNA [NM_133640]
CDK9	NM_001261	Homo sapiens cyclin-dependent kinase 9 (CDK9), mRNA [NM_001261]
TRAPPC10	NM_003274	Homo sapiens trafficking protein particle complex 10 (TRAPPC10), mRNA [NM_003274]
GPC1	NM_002081	Homo sapiens glypican 1 (GPC1), mRNA [NM_002081]
DCAF5	NM_003861	Homo sapiens DDB1 and CUL4 associated factor 5 (DCAF5), transcript variant 1, mRNA [NM_003861]
CPPED1	NM_018340	Homo sapiens calcineurin-like phosphoesterase domain containing 1 (CPPED1), transcript variant 1, mRNA [NM_018340]
YAF2	NM_001190979	Homo sapiens YY1 associated factor 2 (YAF2), transcript variant 1, mRNA [NM_001190979]
MESDC1	NM_022566	Homo sapiens mesoderm development candidate 1 (MESDC1), mRNA [NM_022566]
JAG1	NM_000214	Homo sapiens jagged 1 (JAG1), mRNA [NM_000214]
PFKFB2	NM_006212	Homo sapiens 6-phosphofructo-2-kinase/fructose-2,6-biphosphatase 2 (PFKFB2), transcript variant 1, mRNA [NM_006212]
USP7	NM_001286458	Homo sapiens ubiquitin specific peptidase 7 (herpes virus-associated) (USP7), transcript variant 3, mRNA [NM_001286458]
SH3BP5L	NM_030645	Homo sapiens SH3-binding domain protein 5-like (SH3BP5L), mRNA [NM_030645]
USP15	NM_006313	Homo sapiens ubiquitin specific peptidase 15 (USP15), transcript variant 2, mRNA [NM_006313]
KIF1C		Human kinesin-like motor protein KIF1C mRNA, complete cds. [U91329]
FUT11	NM_173540	Homo sapiens fucosyltransferase 11 (alpha (1,3) fucosyltransferase) (FUT11), transcript variant 1, mRNA [NM_173540]
TSC1	NM_000368	Homo sapiens tuberous sclerosis 1 (TSC1), transcript variant 1, mRNA [NM_000368]
SLC15A4	NM_145648	Homo sapiens solute carrier family 15 (oligopeptide transporter), member 4 (SLC15A4), mRNA [NM_145648]
ALKBH5	NM_017758	Homo sapiens alkB, alkylation repair homolog 5 (E. coli) (ALKBH5), mRNA [NM_017758]
PALLD	NM_016081	Homo sapiens palladin, cytoskeletal associated protein (PALLD), transcript variant 2, mRNA [NM_016081]
GSTA4	NM_001512	Homo sapiens glutathione S-transferase alpha 4 (GSTA4), mRNA [NM_001512]
AK3	NM_016282	Homo sapiens adenylate kinase 3 (AK3), transcript variant 1, mRNA [NM_016282]
LAMC1	NM_002293	Homo sapiens laminin, gamma 1 (formerly LAMB2) (LAMC1), mRNA [NM_002293]
PI4K2A	NM_018425	Homo sapiens phosphatidylinositol 4-kinase type 2 alpha (PI4K2A), mRNA [NM_018425]
EMP2	NM_001424	Homo sapiens epithelial membrane protein 2 (EMP2), mRNA [NM_001424]
YME1L1	NM_139312	Homo sapiens YME1-like 1 ATPase (YME1L1), transcript variant 1, mRNA [NM_139312]
ZNRF1	NM_032268	Homo sapiens zinc and ring finger 1, E3 ubiquitin protein ligase (ZNRF1), mRNA [NM_032268]
GEN1		Homo sapiens Gen homolog 1, endonuclease (Drosophila), mRNA (cDNA clone IMAGE:4513298), with apparent retained intron. [BC035863]
PTPRJ	NM_002843	Homo sapiens protein tyrosine phosphatase, receptor type, J (PTPRJ), transcript variant 1, mRNA [NM_002843]
ZNF576	NM_024327	Homo sapiens zinc finger protein 576 (ZNF576), transcript variant 1, mRNA [NM_024327]
ELAC2	NM_018127	Homo sapiens elaC ribonuclease Z 2 (ELAC2), transcript variant 1, mRNA [NM_018127]
ADIPOR2	NM_024551	Homo sapiens adiponectin receptor 2 (ADIPOR2), mRNA [NM_024551]
KCNJ14	NM_013348	Homo sapiens potassium inwardly-rectifying channel, subfamily J, member 14 (KCNJ14), mRNA [NM_013348]
RMND5A	NM_022780	Homo sapiens required for meiotic nuclear division 5 homolog A (S. cerevisiae) (RMND5A), mRNA [NM_022780]
AGPAT6	NM_178819	Homo sapiens 1-acylglycerol-3-phosphate O-acyltransferase 6 (AGPAT6), mRNA [NM_178819]
HNRNPUL2	NM_001079559	Homo sapiens heterogeneous nuclear ribonucleoprotein U-like 2 (HNRNPUL2), mRNA [NM_001079559]
POLE3	NM_017443	Homo sapiens polymerase (DNA directed), epsilon 3, accessory subunit (POLE3), transcript variant 1, mRNA [NM_017443]
MPP7	NM_173496	Homo sapiens membrane protein, palmitoylated 7 (MAGUK p55 subfamily member 7) (MPP7), mRNA [NM_173496]
IGF2BP3	NM_006547	Homo sapiens insulin-like growth factor 2 mRNA binding protein 3 (IGF2BP3), mRNA [NM_006547]
RSL1D1	NM_015659	Homo sapiens ribosomal L1 domain containing 1 (RSL1D1), mRNA [NM_015659]
LYPLA2	NM_007260	Homo sapiens lysophospholipase II (LYPLA2), mRNA [NM_007260]
IMPACT	NM_018439	Homo sapiens impact RWD domain protein (IMPACT), mRNA [NM_018439]
FBXW7	NM_033632	Homo sapiens F-box and WD repeat domain containing 7, E3 ubiquitin protein ligase (FBXW7), transcript variant 1, mRNA [NM_033632]
HBS1L	NM_006620	Homo sapiens HBS1-like (S. cerevisiae) (HBS1L), transcript variant 1, mRNA [NM_006620]
NDRG2	NM_201535	Homo sapiens NDRG family member 2 (NDRG2), transcript variant 1, mRNA [NM_201535]
PLAGL2	NM_002657	Homo sapiens pleiomorphic adenoma gene-like 2 (PLAGL2), mRNA [NM_002657]
TXLNA	NM_175852	Homo sapiens taxilin alpha (TXLNA), mRNA [NM_175852]
C17orf59	NM_017622	Homo sapiens chromosome 17 open reading frame 59 (C17orf59), mRNA [NM_017622]
ARHGAP1	NM_004308	Homo sapiens Rho GTPase activating protein 1 (ARHGAP1), mRNA [NM_004308]
DDX17	NM_006386	Homo sapiens DEAD (Asp-Glu-Ala-Asp) box helicase 17 (DDX17), transcript variant 1, mRNA [NM_006386]
FEZ2	NM_001042548	Homo sapiens fasciculation and elongation protein zeta 2 (zygin II) (FEZ2), transcript variant 2, mRNA [NM_001042548]
CALM3	NM_005184	Homo sapiens calmodulin 3 (phosphorylase kinase, delta) (CALM3), mRNA [NM_005184]
ACSF3	NM_174917	Homo sapiens acyl-CoA synthetase family member 3 (ACSF3), transcript variant 1, mRNA [NM_174917]
MBIP	NM_016586	Homo sapiens MAP3K12 binding inhibitory protein 1 (MBIP), transcript variant 1, mRNA [NM_016586]
EYA3	NM_001990	Homo sapiens eyes absent homolog 3 (Drosophila) (EYA3), transcript variant 1, mRNA [NM_001990]
ISCA1	NM_030940	Homo sapiens iron-sulfur cluster assembly 1 (ISCA1), mRNA [NM_030940]
ATXN7L3B	NM_001136262	Homo sapiens ataxin 7-like 3B (ATXN7L3B), mRNA [NM_001136262]
C17orf70	NM_025161	Homo sapiens chromosome 17 open reading frame 70 (C17orf70), transcript variant 2, mRNA [NM_025161]
ADNP2	NM_014913	Homo sapiens ADNP homeobox 2 (ADNP2), mRNA [NM_014913]
SMC5	NM_015110	Homo sapiens structural maintenance of chromosomes 5 (SMC5), mRNA [NM_015110]
STX2	NM_001980	Homo sapiens syntaxin 2 (STX2), transcript variant 1, mRNA [NM_001980]
AAMP	NM_001087	Homo sapiens angio-associated, migratory cell protein (AAMP), mRNA [NM_001087]
DLST	NM_001933	Homo sapiens dihydrolipoamide S-succinyltransferase (E2 component of 2-oxo-glutarate complex) (DLST), transcript variant 1, mRNA [NM_001933]
USP24	NM_015306	Homo sapiens ubiquitin specific peptidase 24 (USP24), mRNA [NM_015306]
TMEM87B	NM_032824	Homo sapiens transmembrane protein 87B (TMEM87B), mRNA [NM_032824]
CDC34	NM_004359	Homo sapiens cell division cycle 34 (CDC34), mRNA [NM_004359]
GRB2	NM_002086	Homo sapiens growth factor receptor-bound protein 2 (GRB2), transcript variant 1, mRNA [NM_002086]
FKBP1A	NM_000801	Homo sapiens FK506 binding protein 1A, 12kDa (FKBP1A), transcript variant 1, mRNA [NM_000801]
DTWD2	NM_173666	Homo sapiens DTW domain containing 2 (DTWD2), mRNA [NM_173666]
GPR107		Homo sapiens cDNA: FLJ22591 fis, clone HSI03124. [AK026244]
RPS6KA3	NM_004586	Homo sapiens ribosomal protein S6 kinase, 90kDa, polypeptide 3 (RPS6KA3), mRNA [NM_004586]
ZNF652	NM_014897	Homo sapiens zinc finger protein 652 (ZNF652), transcript variant 2, mRNA [NM_014897]
ZNF445	NM_181489	Homo sapiens zinc finger protein 445 (ZNF445), mRNA [NM_181489]
EPB41L1	NM_012156	Homo sapiens erythrocyte membrane protein band 4.1-like 1 (EPB41L1), transcript variant 1, mRNA [NM_012156]
GLT8D1	NM_001010983	Homo sapiens glycosyltransferase 8 domain containing 1 (GLT8D1), transcript variant 3, mRNA [NM_001010983]
ITGB1	NM_133376	Homo sapiens integrin, beta 1 (fibronectin receptor, beta polypeptide, antigen CD29 includes MDF2, MSK12) (ITGB1), transcript variant 1E, mRNA [NM_133376]
RPS6KA1	NM_002953	Homo sapiens ribosomal protein S6 kinase, 90kDa, polypeptide 1 (RPS6KA1), transcript variant 1, mRNA [NM_002953]
KATNAL1	NM_032116	Homo sapiens katanin p60 subunit A-like 1 (KATNAL1), transcript variant 1, mRNA [NM_032116]
CERK	NM_022766	Homo sapiens ceramide kinase (CERK), mRNA [NM_022766]
TNRC6B	NM_015088	Homo sapiens trinucleotide repeat containing 6B (TNRC6B), transcript variant 2, mRNA [NM_015088]
LDOC1L	NM_032287	Homo sapiens leucine zipper, down-regulated in cancer 1-like (LDOC1L), mRNA [NM_032287]
MTG1		Homo sapiens cDNA FLJ90495 fis, clone NT2RP3003729. [AK074976]
ATP2A2	NM_001681	Homo sapiens ATPase, Ca++ transporting, cardiac muscle, slow twitch 2 (ATP2A2), transcript variant a, mRNA [NM_001681]
ZNF512B	NM_020713	Homo sapiens zinc finger protein 512B (ZNF512B), mRNA [NM_020713]
HOXA3	NM_153631	Homo sapiens homeobox A3 (HOXA3), transcript variant 2, mRNA [NM_153631]
SLC12A2	NM_001046	Homo sapiens solute carrier family 12 (sodium/potassium/chloride transporter), member 2 (SLC12A2), transcript variant 1, mRNA [NM_001046]
MYO1B	NM_012223	Homo sapiens myosin IB (MYO1B), transcript variant 2, mRNA [NM_012223]
PDXK	NM_003681	Homo sapiens pyridoxal (pyridoxine, vitamin B6) kinase (PDXK), mRNA [NM_003681]
ATXN7L3	NM_020218	Homo sapiens ataxin 7-like 3 (ATXN7L3), transcript variant 1, mRNA [NM_020218]
ST5	NM_005418	Homo sapiens suppression of tumorigenicity 5 (ST5), transcript variant 1, mRNA [NM_005418]
EIF4EBP2	NM_004096	Homo sapiens eukaryotic translation initiation factor 4E binding protein 2 (EIF4EBP2), mRNA [NM_004096]
CRISPLD1	NM_031461	Homo sapiens cysteine-rich secretory protein LCCL domain containing 1 (CRISPLD1), transcript variant 1, mRNA [NM_031461]
IQCE	NM_152558	Homo sapiens IQ motif containing E (IQCE), transcript variant 1, mRNA [NM_152558]
ARHGEF19	NM_153213	Homo sapiens Rho guanine nucleotide exchange factor (GEF) 19 (ARHGEF19), mRNA [NM_153213]
DPM2	NM_003863	Homo sapiens dolichyl-phosphate mannosyltransferase polypeptide 2, regulatory subunit (DPM2), mRNA [NM_003863]
TTYH3	NM_025250	Homo sapiens tweety family member 3 (TTYH3), mRNA [NM_025250]
TMOD3	NM_014547	Homo sapiens tropomodulin 3 (ubiquitous) (TMOD3), mRNA [NM_014547]
KIAA0319L	NM_024874	Homo sapiens KIAA0319-like (KIAA0319L), mRNA [NM_024874]
WDR89	NM_001008726	Homo sapiens WD repeat domain 89 (WDR89), transcript variant 1, mRNA [NM_001008726]
PLEKHA1	NM_001001974	Homo sapiens pleckstrin homology domain containing, family A (phosphoinositide binding specific) member 1 (PLEKHA1), transcript variant 2, mRNA [NM_001001974]
RXRA	NM_002957	Homo sapiens retinoid X receptor, alpha (RXRA), mRNA [NM_002957]
ZBTB47	NM_145166	Homo sapiens zinc finger and BTB domain containing 47 (ZBTB47), mRNA [NM_145166]
LRP12	NM_013437	Homo sapiens low density lipoprotein receptor-related protein 12 (LRP12), transcript variant 1, mRNA [NM_013437]
SH3BGRL	NM_003022	Homo sapiens SH3 domain binding glutamic acid-rich protein like (SH3BGRL), mRNA [NM_003022]
PRMT6	NM_018137	Homo sapiens protein arginine methyltransferase 6 (PRMT6), mRNA [NM_018137]
ABI2	NM_005759	Homo sapiens abl-interactor 2 (ABI2), transcript variant 3, mRNA [NM_005759]
AMMECR1L	NM_031445	Homo sapiens AMMECR1-like (AMMECR1L), transcript variant 1, mRNA [NM_031445]
B4GALT1	NM_001497	Homo sapiens UDP-Gal:betaGlcNAc beta 1,4- galactosyltransferase, polypeptide 1 (B4GALT1), mRNA [NM_001497]
KIAA1467	NM_020853	Homo sapiens KIAA1467 (KIAA1467), mRNA [NM_020853]
STXBP5	NM_001127715	Homo sapiens syntaxin binding protein 5 (tomosyn) (STXBP5), transcript variant 2, mRNA [NM_001127715]
CDS2	NM_003818	Homo sapiens CDP-diacylglycerol synthase (phosphatidate cytidylyltransferase) 2 (CDS2), mRNA [NM_003818]
QPCTL	NM_017659	Homo sapiens glutaminyl-peptide cyclotransferase-like (QPCTL), transcript variant 1, mRNA [NM_017659]
USP22	NM_015276	Homo sapiens ubiquitin specific peptidase 22 (USP22), mRNA [NM_015276]
BUB3	NM_004725	Homo sapiens BUB3 mitotic checkpoint protein (BUB3), transcript variant 1, mRNA [NM_004725]
SCARB2	NM_005506	Homo sapiens scavenger receptor class B, member 2 (SCARB2), transcript variant 1, mRNA [NM_005506]
ANKHD1	NM_024668	Homo sapiens ankyrin repeat and KH domain containing 1 (ANKHD1), transcript variant 3, mRNA [NM_024668]
ZNF24	NM_006965	Homo sapiens zinc finger protein 24 (ZNF24), mRNA [NM_006965]
COL6A1	NM_001848	Homo sapiens collagen, type VI, alpha 1 (COL6A1), mRNA [NM_001848]
METTL17	NM_022734	Homo sapiens methyltransferase like 17 (METTL17), transcript variant 2, mRNA [NM_022734]
CAMKK2	NM_172215	Homo sapiens calcium/calmodulin-dependent protein kinase kinase 2, beta (CAMKK2), transcript variant 6, mRNA [NM_172215]
SLC16A9	NM_194298	Homo sapiens solute carrier family 16, member 9 (SLC16A9), mRNA [NM_194298]
PITPNB	NM_012399	Homo sapiens phosphatidylinositol transfer protein, beta (PITPNB), transcript variant sp1, mRNA [NM_012399]
UTP15	NM_032175	Homo sapiens UTP15, U3 small nucleolar ribonucleoprotein, homolog (S. cerevisiae) (UTP15), transcript variant 1, mRNA [NM_032175]
ITGA3	NM_002204	Homo sapiens integrin, alpha 3 (antigen CD49C, alpha 3 subunit of VLA-3 receptor) (ITGA3), transcript variant a, mRNA [NM_002204]
RAD51D	NM_001142571	Homo sapiens RAD51 paralog D (RAD51D), transcript variant 6, mRNA [NM_001142571]
BBS2	NM_031885	Homo sapiens Bardet-Biedl syndrome 2 (BBS2), mRNA [NM_031885]
HEY1	NM_001040708	Homo sapiens hes-related family bHLH transcription factor with YRPW motif 1 (HEY1), transcript variant 2, mRNA [NM_001040708]
INPP1	NM_002194	Homo sapiens inositol polyphosphate-1-phosphatase (INPP1), transcript variant 2, mRNA [NM_002194]
FADS2	NM_004265	Homo sapiens fatty acid desaturase 2 (FADS2), transcript variant 1, mRNA [NM_004265]
SP3	NM_003111	Homo sapiens Sp3 transcription factor (SP3), transcript variant 1, mRNA [NM_003111]
XPNPEP3	NM_022098	Homo sapiens X-prolyl aminopeptidase (aminopeptidase P) 3, putative (XPNPEP3), transcript variant 1, mRNA [NM_022098]
RHOBTB3	NM_014899	Homo sapiens Rho-related BTB domain containing 3 (RHOBTB3), mRNA [NM_014899]
AP3S2	NM_005829	Homo sapiens adaptor-related protein complex 3, sigma 2 subunit (AP3S2), transcript variant 1, mRNA [NM_005829]
GOLGA1	NM_002077	Homo sapiens golgin A1 (GOLGA1), mRNA [NM_002077]
DEXI	NM_014015	Homo sapiens Dexi homolog (mouse) (DEXI), mRNA [NM_014015]
PPFIBP1	NM_003622	Homo sapiens PTPRF interacting protein, binding protein 1 (liprin beta 1) (PPFIBP1), transcript variant 1, mRNA [NM_003622]
GNL3L	NM_019067	Homo sapiens guanine nucleotide binding protein-like 3 (nucleolar)-like (GNL3L), transcript variant 2, mRNA [NM_019067]
VSIG10		Homo sapiens hypothetical protein FLJ20674, mRNA (cDNA clone IMAGE:3138594). [BC001437]
C1orf122	NM_198446	Homo sapiens chromosome 1 open reading frame 122 (C1orf122), transcript variant 1, mRNA [NM_198446]
C1QTNF6	NM_031910	Homo sapiens C1q and tumor necrosis factor related protein 6 (C1QTNF6), transcript variant 1, mRNA [NM_031910]
GRWD1	NM_031485	Homo sapiens glutamate-rich WD repeat containing 1 (GRWD1), mRNA [NM_031485]
ATAD1	NM_032810	Homo sapiens ATPase family, AAA domain containing 1 (ATAD1), mRNA [NM_032810]
LCLAT1	NM_182551	Homo sapiens lysocardiolipin acyltransferase 1 (LCLAT1), transcript variant 1, mRNA [NM_182551]
DEF8	NM_207514	Homo sapiens differentially expressed in FDCP 8 homolog (mouse) (DEF8), transcript variant 1, mRNA [NM_207514]
ERP29	NM_006817	Homo sapiens endoplasmic reticulum protein 29 (ERP29), transcript variant 1, mRNA [NM_006817]
DUSP16	NM_030640	Homo sapiens dual specificity phosphatase 16 (DUSP16), mRNA [NM_030640]
STYX	NM_145251	Homo sapiens serine/threonine/tyrosine interacting protein (STYX), transcript variant 1, mRNA [NM_145251]
DPY19L1	NM_015283	Homo sapiens dpy-19-like 1 (C. elegans) (DPY19L1), mRNA [NM_015283]
MTMR2	NM_201278	Homo sapiens myotubularin related protein 2 (MTMR2), transcript variant 2, mRNA [NM_201278]
EIF4E	NM_001130679	Homo sapiens eukaryotic translation initiation factor 4E (EIF4E), transcript variant 2, mRNA [NM_001130679]
FXR1	NM_001013439	Homo sapiens fragile X mental retardation, autosomal homolog 1 (FXR1), transcript variant 3, mRNA [NM_001013439]
SH3PXD2A	NM_014631	Homo sapiens SH3 and PX domains 2A (SH3PXD2A), mRNA [NM_014631]
NDRG4	NM_022910	Homo sapiens NDRG family member 4 (NDRG4), transcript variant 3, mRNA [NM_022910]
QSOX1	NM_002826	Homo sapiens quiescin Q6 sulfhydryl oxidase 1 (QSOX1), transcript variant 1, mRNA [NM_002826]
SLC1A5	NM_005628	Homo sapiens solute carrier family 1 (neutral amino acid transporter), member 5 (SLC1A5), transcript variant 1, mRNA [NM_005628]
C9orf69	NM_001256526	Homo sapiens chromosome 9 open reading frame 69 (C9orf69), transcript variant 2, mRNA [NM_001256526]
AKIRIN2	NM_018064	Homo sapiens akirin 2 (AKIRIN2), mRNA [NM_018064]
HMGCR	NM_000859	Homo sapiens 3-hydroxy-3-methylglutaryl-CoA reductase (HMGCR), transcript variant 1, mRNA [NM_000859]
PRCP	NM_199418	Homo sapiens prolylcarboxypeptidase (angiotensinase C) (PRCP), transcript variant 2, mRNA [NM_199418]
TMEM185B	NM_024121	Homo sapiens transmembrane protein 185B (TMEM185B), mRNA [NM_024121]
ATP2B4	NM_001684	Homo sapiens ATPase, Ca++ transporting, plasma membrane 4 (ATP2B4), transcript variant 2, mRNA [NM_001684]
SFXN1	NM_022754	Homo sapiens sideroflexin 1 (SFXN1), mRNA [NM_022754]
FAM168B	NM_001009993	Homo sapiens family with sequence similarity 168, member B (FAM168B), mRNA [NM_001009993]
MESDC2	NM_015154	Homo sapiens mesoderm development candidate 2 (MESDC2), mRNA [NM_015154]
BIRC5	NM_001012271	Homo sapiens baculoviral IAP repeat containing 5 (BIRC5), transcript variant 3, mRNA [NM_001012271]
EXTL3	NM_001440	Homo sapiens exostosin-like glycosyltransferase 3 (EXTL3), transcript variant 1, mRNA [NM_001440]
RRM2	NM_001034	Homo sapiens ribonucleotide reductase M2 (RRM2), transcript variant 2, mRNA [NM_001034]
BTBD3	NM_014962	Homo sapiens BTB (POZ) domain containing 3 (BTBD3), transcript variant 1, mRNA [NM_014962]
PTPN18	NM_014369	Homo sapiens protein tyrosine phosphatase, non-receptor type 18 (brain-derived) (PTPN18), transcript variant 1, mRNA [NM_014369]
HYOU1	NM_006389	Homo sapiens hypoxia up-regulated 1 (HYOU1), transcript variant 1, mRNA [NM_006389]
PDIK1L	NM_152835	Homo sapiens PDLIM1 interacting kinase 1 like (PDIK1L), transcript variant 1, mRNA [NM_152835]
DOK4	NM_018110	Homo sapiens docking protein 4 (DOK4), mRNA [NM_018110]
PIGK	NM_005482	Homo sapiens phosphatidylinositol glycan anchor biosynthesis, class K (PIGK), mRNA [NM_005482]
PM20D2	NM_001010853	Homo sapiens peptidase M20 domain containing 2 (PM20D2), mRNA [NM_001010853]
WDR5	NM_017588	Homo sapiens WD repeat domain 5 (WDR5), transcript variant 1, mRNA [NM_017588]
PTP4A2	NM_080391	Homo sapiens protein tyrosine phosphatase type IVA, member 2 (PTP4A2), transcript variant 1, mRNA [NM_080391]
CDC25A	NM_001789	Homo sapiens cell division cycle 25A (CDC25A), transcript variant 1, mRNA [NM_001789]
SSU72	NM_014188	Homo sapiens SSU72 RNA polymerase II CTD phosphatase homolog (S. cerevisiae) (SSU72), mRNA [NM_014188]
ASB1	NM_001040445	Homo sapiens ankyrin repeat and SOCS box containing 1 (ASB1), mRNA [NM_001040445]
SPPL2A	NM_032802	Homo sapiens signal peptide peptidase like 2A (SPPL2A), mRNA [NM_032802]
SNX19	NM_014758	Homo sapiens sorting nexin 19 (SNX19), mRNA [NM_014758]
TTC19	NM_017775	Homo sapiens tetratricopeptide repeat domain 19 (TTC19), transcript variant 1, mRNA [NM_017775]
GNAL	NM_182978	Homo sapiens guanine nucleotide binding protein (G protein), alpha activating activity polypeptide, olfactory type (GNAL), transcript variant 1, mRNA [NM_182978]
DHRS13	NM_144683	Homo sapiens dehydrogenase/reductase (SDR family) member 13 (DHRS13), mRNA [NM_144683]
CDCA5	NM_080668	Homo sapiens cell division cycle associated 5 (CDCA5), mRNA [NM_080668]
CSNK2A1		casein kinase 2, alpha 1 polypeptide [Source:HGNC Symbol;Acc:2457] [ENST00000217244]
UBE2V2	NM_003350	Homo sapiens ubiquitin-conjugating enzyme E2 variant 2 (UBE2V2), mRNA [NM_003350]
BRD3	NM_007371	Homo sapiens bromodomain containing 3 (BRD3), mRNA [NM_007371]
WBP2	NM_012478	Homo sapiens WW domain binding protein 2 (WBP2), mRNA [NM_012478]
NR3C1	NM_001018077	Homo sapiens nuclear receptor subfamily 3, group C, member 1 (glucocorticoid receptor) (NR3C1), transcript variant 5, mRNA [NM_001018077]
NPEPPS	NM_006310	Homo sapiens aminopeptidase puromycin sensitive (NPEPPS), mRNA [NM_006310]
LIG3	NM_002311	Homo sapiens ligase III, DNA, ATP-dependent (LIG3), transcript variant beta, mRNA [NM_002311]
KIAA1147	NM_001080392	Homo sapiens KIAA1147 (KIAA1147), mRNA [NM_001080392]
PDSS2	NM_020381	Homo sapiens prenyl (decaprenyl) diphosphate synthase, subunit 2 (PDSS2), mRNA [NM_020381]
GSTCD	NM_001031720	Homo sapiens glutathione S-transferase, C-terminal domain containing (GSTCD), transcript variant 1, mRNA [NM_001031720]
COASY	NM_025233	Homo sapiens CoA synthase (COASY), transcript variant 1, mRNA [NM_025233]
NUDT2	NM_001161	Homo sapiens nudix (nucleoside diphosphate linked moiety X)-type motif 2 (NUDT2), transcript variant 1, mRNA [NM_001161]
STK35	NM_080836	Homo sapiens serine/threonine kinase 35 (STK35), mRNA [NM_080836]
SENP2		Homo sapiens sentrin-specific protease (SENP2) mRNA, complete cds. [AF151697]
RPL41	NM_001035267	Homo sapiens ribosomal protein L41 (RPL41), transcript variant 2, mRNA [NM_001035267]
PCGF3	NM_006315	Homo sapiens polycomb group ring finger 3 (PCGF3), mRNA [NM_006315]
COL4A3BP	NM_001130105	Homo sapiens collagen, type IV, alpha 3 (Goodpasture antigen) binding protein (COL4A3BP), transcript variant 3, mRNA [NM_001130105]
SRXN1	NM_080725	Homo sapiens sulfiredoxin 1 (SRXN1), mRNA [NM_080725]
NHP2L1	NM_005008	Homo sapiens NHP2 non-histone chromosome protein 2-like 1 (S. cerevisiae) (NHP2L1), transcript variant 1, mRNA [NM_005008]
TSNAX	NM_005999	Homo sapiens translin-associated factor X (TSNAX), mRNA [NM_005999]
ABCC5	NM_005688	Homo sapiens ATP-binding cassette, sub-family C (CFTR/MRP), member 5 (ABCC5), transcript variant 1, mRNA [NM_005688]
SAR1B	NM_001033503	Homo sapiens SAR1 homolog B (S. cerevisiae) (SAR1B), transcript variant 1, mRNA [NM_001033503]
VGLL4	NM_014667	Homo sapiens vestigial like 4 (Drosophila) (VGLL4), transcript variant 2, mRNA [NM_014667]
TCTEX1D2	NM_152773	Homo sapiens Tctex1 domain containing 2 (TCTEX1D2), mRNA [NM_152773]
GPR161	NM_001267609	Homo sapiens G protein-coupled receptor 161 (GPR161), transcript variant 1, mRNA [NM_001267609]
TGOLN2	NM_006464	Homo sapiens trans-golgi network protein 2 (TGOLN2), transcript variant 1, mRNA [NM_006464]
IL15	NM_172175	Homo sapiens interleukin 15 (IL15), transcript variant 2, mRNA [NM_172175]
DCTN4	NM_016221	Homo sapiens dynactin 4 (p62) (DCTN4), transcript variant 2, mRNA [NM_016221]
HGSNAT	NM_152419	Homo sapiens heparan-alpha-glucosaminide N-acetyltransferase (HGSNAT), mRNA [NM_152419]
SLC19A1	NM_194255	Homo sapiens solute carrier family 19 (folate transporter), member 1 (SLC19A1), transcript variant 1, mRNA [NM_194255]
ING3		inhibitor of growth family, member 3 [Source:HGNC Symbol;Acc:14587] [ENST00000315870]
SBF1	NM_002972	Homo sapiens SET binding factor 1 (SBF1), mRNA [NM_002972]
EEA1	NM_003566	Homo sapiens early endosome antigen 1 (EEA1), mRNA [NM_003566]
PMF1	NM_007221	Homo sapiens polyamine-modulated factor 1 (PMF1), transcript variant 2, mRNA [NM_007221]
EIF2D	NM_006893	Homo sapiens eukaryotic translation initiation factor 2D (EIF2D), transcript variant 1, mRNA [NM_006893]
GTPBP1	NM_004286	Homo sapiens GTP binding protein 1 (GTPBP1), mRNA [NM_004286]
ABCF2	NM_005692	Homo sapiens ATP-binding cassette, sub-family F (GCN20), member 2 (ABCF2), transcript variant 2, mRNA [NM_005692]
RAB21	NM_014999	Homo sapiens RAB21, member RAS oncogene family (RAB21), mRNA [NM_014999]
DAK	NM_015533	Homo sapiens dihydroxyacetone kinase 2 homolog (S. cerevisiae) (DAK), mRNA [NM_015533]
DKC1	NM_001363	Homo sapiens dyskeratosis congenita 1, dyskerin (DKC1), transcript variant 1, mRNA [NM_001363]
NEK7	NM_133494	Homo sapiens NIMA-related kinase 7 (NEK7), mRNA [NM_133494]
ALDH4A1	NM_003748	Homo sapiens aldehyde dehydrogenase 4 family, member A1 (ALDH4A1), transcript variant P5CDhL, mRNA [NM_003748]
RAB1A	NM_004161	Homo sapiens RAB1A, member RAS oncogene family (RAB1A), transcript variant 1, mRNA [NM_004161]
PURB	NM_033224	Homo sapiens purine-rich element binding protein B (PURB), mRNA [NM_033224]
FOPNL	NM_144600	Homo sapiens FGFR1OP N-terminal like (FOPNL), mRNA [NM_144600]
RNF41	NM_194358	Homo sapiens ring finger protein 41 (RNF41), transcript variant 2, mRNA [NM_194358]
TMEM64	NM_001008495	Homo sapiens transmembrane protein 64 (TMEM64), transcript variant 1, mRNA [NM_001008495]
SLC25A26	NM_173471	Homo sapiens solute carrier family 25 (S-adenosylmethionine carrier), member 26 (SLC25A26), transcript variant 1, mRNA [NM_173471]
REEP5	NM_005669	Homo sapiens receptor accessory protein 5 (REEP5), mRNA [NM_005669]
CLSTN1	NM_001009566	Homo sapiens calsyntenin 1 (CLSTN1), transcript variant 1, mRNA [NM_001009566]
RWDD4	NM_152682	Homo sapiens RWD domain containing 4 (RWDD4), mRNA [NM_152682]
KIAA0226	NM_001145642	Homo sapiens KIAA0226 (KIAA0226), transcript variant 1, mRNA [NM_001145642]
TXNRD1	NM_003330	Homo sapiens thioredoxin reductase 1 (TXNRD1), transcript variant 1, mRNA [NM_003330]
ATP5SL	NM_018035	Homo sapiens ATP5S-like (ATP5SL), transcript variant 4, mRNA [NM_018035]
UBE3C	NM_014671	Homo sapiens ubiquitin protein ligase E3C (UBE3C), mRNA [NM_014671]
TRMT2B	NM_024917	Homo sapiens tRNA methyltransferase 2 homolog B (S. cerevisiae) (TRMT2B), transcript variant 1, mRNA [NM_024917]
TWSG1	NM_020648	Homo sapiens twisted gastrulation BMP signaling modulator 1 (TWSG1), mRNA [NM_020648]
GNAI2	NM_002070	Homo sapiens guanine nucleotide binding protein (G protein), alpha inhibiting activity polypeptide 2 (GNAI2), transcript variant 1, mRNA [NM_002070]
CREG1	NM_003851	Homo sapiens cellular repressor of E1A-stimulated genes 1 (CREG1), mRNA [NM_003851]
TMTC3	NM_181783	Homo sapiens transmembrane and tetratricopeptide repeat containing 3 (TMTC3), mRNA [NM_181783]
UBFD1	NM_019116	Homo sapiens ubiquitin family domain containing 1 (UBFD1), mRNA [NM_019116]
MANF	NM_006010	Homo sapiens mesencephalic astrocyte-derived neurotrophic factor (MANF), mRNA [NM_006010]
MAGEF1	NM_022149	Homo sapiens melanoma antigen family F, 1 (MAGEF1), mRNA [NM_022149]
HIPK1	NM_198268	Homo sapiens homeodomain interacting protein kinase 1 (HIPK1), transcript variant 1, mRNA [NM_198268]
RAB14	NM_016322	Homo sapiens RAB14, member RAS oncogene family (RAB14), mRNA [NM_016322]
SLC39A6	NM_012319	Homo sapiens solute carrier family 39 (zinc transporter), member 6 (SLC39A6), transcript variant 1, mRNA [NM_012319]
SLK	NM_014720	Homo sapiens STE20-like kinase (SLK), mRNA [NM_014720]
PGD	NM_002631	Homo sapiens phosphogluconate dehydrogenase (PGD), mRNA [NM_002631]
ARPC1B	NM_005720	Homo sapiens actin related protein 2/3 complex, subunit 1B, 41kDa (ARPC1B), mRNA [NM_005720]
AGK	NM_018238	Homo sapiens acylglycerol kinase (AGK), mRNA [NM_018238]
SLC39A9	NM_018375	Homo sapiens solute carrier family 39, member 9 (SLC39A9), transcript variant 1, mRNA [NM_018375]
SRSF7	NM_001031684	Homo sapiens serine/arginine-rich splicing factor 7 (SRSF7), transcript variant 1, mRNA [NM_001031684]
CTDSP2	NM_005730	Homo sapiens CTD (carboxy-terminal domain, RNA polymerase II, polypeptide A) small phosphatase 2 (CTDSP2), mRNA [NM_005730]
BRWD1	NM_001007246	Homo sapiens bromodomain and WD repeat domain containing 1 (BRWD1), transcript variant 3, mRNA [NM_001007246]
NRP1	NM_003873	Homo sapiens neuropilin 1 (NRP1), transcript variant 1, mRNA [NM_003873]
NEURL1B	NM_001142651	Homo sapiens neuralized E3 ubiquitin protein ligase 1B (NEURL1B), mRNA [NM_001142651]
ARPC5	NM_005717	Homo sapiens actin related protein 2/3 complex, subunit 5, 16kDa (ARPC5), transcript variant 1, mRNA [NM_005717]
POMGNT1	NM_017739	Homo sapiens protein O-linked mannose N-acetylglucosaminyltransferase 1 (beta 1,2-) (POMGNT1), transcript variant 1, mRNA [NM_017739]
RUNX3	NM_001031680	Homo sapiens runt-related transcription factor 3 (RUNX3), transcript variant 1, mRNA [NM_001031680]
RRP1B	NM_015056	Homo sapiens ribosomal RNA processing 1B (RRP1B), mRNA [NM_015056]
PIGV	NM_017837	Homo sapiens phosphatidylinositol glycan anchor biosynthesis, class V (PIGV), transcript variant 2, mRNA [NM_017837]
ALG9	NM_001077691	Homo sapiens ALG9, alpha-1,2-mannosyltransferase (ALG9), transcript variant 3, mRNA [NM_001077691]
GTF3C4		general transcription factor IIIC, polypeptide 4, 90kDa [Source:HGNC Symbol;Acc:4667] [ENST00000372146]
C12orf49	NM_024738	Homo sapiens chromosome 12 open reading frame 49 (C12orf49), mRNA [NM_024738]
DNAJB6	NM_005494	Homo sapiens DnaJ (Hsp40) homolog, subfamily B, member 6 (DNAJB6), transcript variant 2, mRNA [NM_005494]
RPL7L1	NM_198486	Homo sapiens ribosomal protein L7-like 1 (RPL7L1), mRNA [NM_198486]
HMGN1	NM_004965	Homo sapiens high mobility group nucleosome binding domain 1 (HMGN1), mRNA [NM_004965]
GRAMD4	NM_015124	Homo sapiens GRAM domain containing 4 (GRAMD4), mRNA [NM_015124]
CBX5	NM_001127322	Homo sapiens chromobox homolog 5 (CBX5), transcript variant 1, mRNA [NM_001127322]
TMEM33	NM_018126	Homo sapiens transmembrane protein 33 (TMEM33), mRNA [NM_018126]
CKS1B	NM_001826	Homo sapiens CDC28 protein kinase regulatory subunit 1B (CKS1B), transcript variant 1, mRNA [NM_001826]
SERBP1	NM_001018067	Homo sapiens SERPINE1 mRNA binding protein 1 (SERBP1), transcript variant 1, mRNA [NM_001018067]
CNOT6	NM_015455	Homo sapiens CCR4-NOT transcription complex, subunit 6 (CNOT6), mRNA [NM_015455]
UACA	NM_001008224	Homo sapiens uveal autoantigen with coiled-coil domains and ankyrin repeats (UACA), transcript variant 2, mRNA [NM_001008224]
VAMP3	NM_004781	Homo sapiens vesicle-associated membrane protein 3 (VAMP3), mRNA [NM_004781]
KLHDC8B	NM_173546	Homo sapiens kelch domain containing 8B (KLHDC8B), mRNA [NM_173546]
CPEB1	NM_030594	Homo sapiens cytoplasmic polyadenylation element binding protein 1 (CPEB1), transcript variant 1, mRNA [NM_030594]
GGCT	NM_024051	Homo sapiens gamma-glutamylcyclotransferase (GGCT), transcript variant 1, mRNA [NM_024051]
SDF2	NM_006923	Homo sapiens stromal cell-derived factor 2 (SDF2), transcript variant 1, mRNA [NM_006923]
FANCC	NM_000136	Homo sapiens Fanconi anemia, complementation group C (FANCC), transcript variant 1, mRNA [NM_000136]
UBE2Q1	NM_017582	Homo sapiens ubiquitin-conjugating enzyme E2Q family member 1 (UBE2Q1), mRNA [NM_017582]
CD59	NM_203330	Homo sapiens CD59 molecule, complement regulatory protein (CD59), transcript variant 1, mRNA [NM_203330]
CBX6	XM_005261412	chromobox homolog 6 [Source:HGNC Symbol;Acc:1556] [ENST00000407418]
IFI27L1	NM_206949	Homo sapiens interferon, alpha-inducible protein 27-like 1 (IFI27L1), transcript variant 2, mRNA [NM_206949]
PURA	NM_005859	Homo sapiens purine-rich element binding protein A (PURA), mRNA [NM_005859]
NUDT21	NM_007006	Homo sapiens nudix (nucleoside diphosphate linked moiety X)-type motif 21 (NUDT21), mRNA [NM_007006]
EPAS1	NM_001430	Homo sapiens endothelial PAS domain protein 1 (EPAS1), mRNA [NM_001430]
HOXA10	NM_018951	Homo sapiens homeobox A10 (HOXA10), transcript variant 1, mRNA [NM_018951]
SEL1L3	XM_005248143	PREDICTED: Homo sapiens sel-1 suppressor of lin-12-like 3 (C. elegans) (SEL1L3), transcript variant X1, mRNA [XM_005248143]
C1S	NM_001734	Homo sapiens complement component 1, s subcomponent (C1S), transcript variant 2, mRNA [NM_001734]
FUNDC2	NM_023934	Homo sapiens FUN14 domain containing 2 (FUNDC2), mRNA [NM_023934]
ENAH	NM_001008493	Homo sapiens enabled homolog (Drosophila) (ENAH), transcript variant 1, mRNA [NM_001008493]
PEX26	NM_001127649	Homo sapiens peroxisomal biogenesis factor 26 (PEX26), transcript variant 2, mRNA [NM_001127649]
TPRG1L	NM_182752	Homo sapiens tumor protein p63 regulated 1-like (TPRG1L), mRNA [NM_182752]
AK4	NM_001005353	Homo sapiens adenylate kinase 4 (AK4), transcript variant 1, mRNA [NM_001005353]
KIF3B	NM_004798	Homo sapiens kinesin family member 3B (KIF3B), mRNA [NM_004798]
PCYOX1	NM_016297	Homo sapiens prenylcysteine oxidase 1 (PCYOX1), mRNA [NM_016297]
TMTC1	NM_175861	Homo sapiens transmembrane and tetratricopeptide repeat containing 1 (TMTC1), transcript variant 2, mRNA [NM_175861]
LPGAT1	NM_014873	Homo sapiens lysophosphatidylglycerol acyltransferase 1 (LPGAT1), mRNA [NM_014873]
IMPAD1	NM_017813	Homo sapiens inositol monophosphatase domain containing 1 (IMPAD1), mRNA [NM_017813]
C8orf33	NM_023080	Homo sapiens chromosome 8 open reading frame 33 (C8orf33), mRNA [NM_023080]
NAA50	NM_025146	Homo sapiens N(alpha)-acetyltransferase 50, NatE catalytic subunit (NAA50), mRNA [NM_025146]
RPIA	NM_144563	Homo sapiens ribose 5-phosphate isomerase A (RPIA), mRNA [NM_144563]
MTPN	NM_145808	Homo sapiens myotrophin (MTPN), mRNA [NM_145808]
IDS	NM_000202	Homo sapiens iduronate 2-sulfatase (IDS), transcript variant 1, mRNA [NM_000202]
